# Supplementary material
Source: Springer Nature journal article supplement (https://www.springermedizin.de/resource/supplementary/12936_2007_477_MOESM2_ESM.pdf/9547974)
Supplement: MOESM2 [file 9547974]

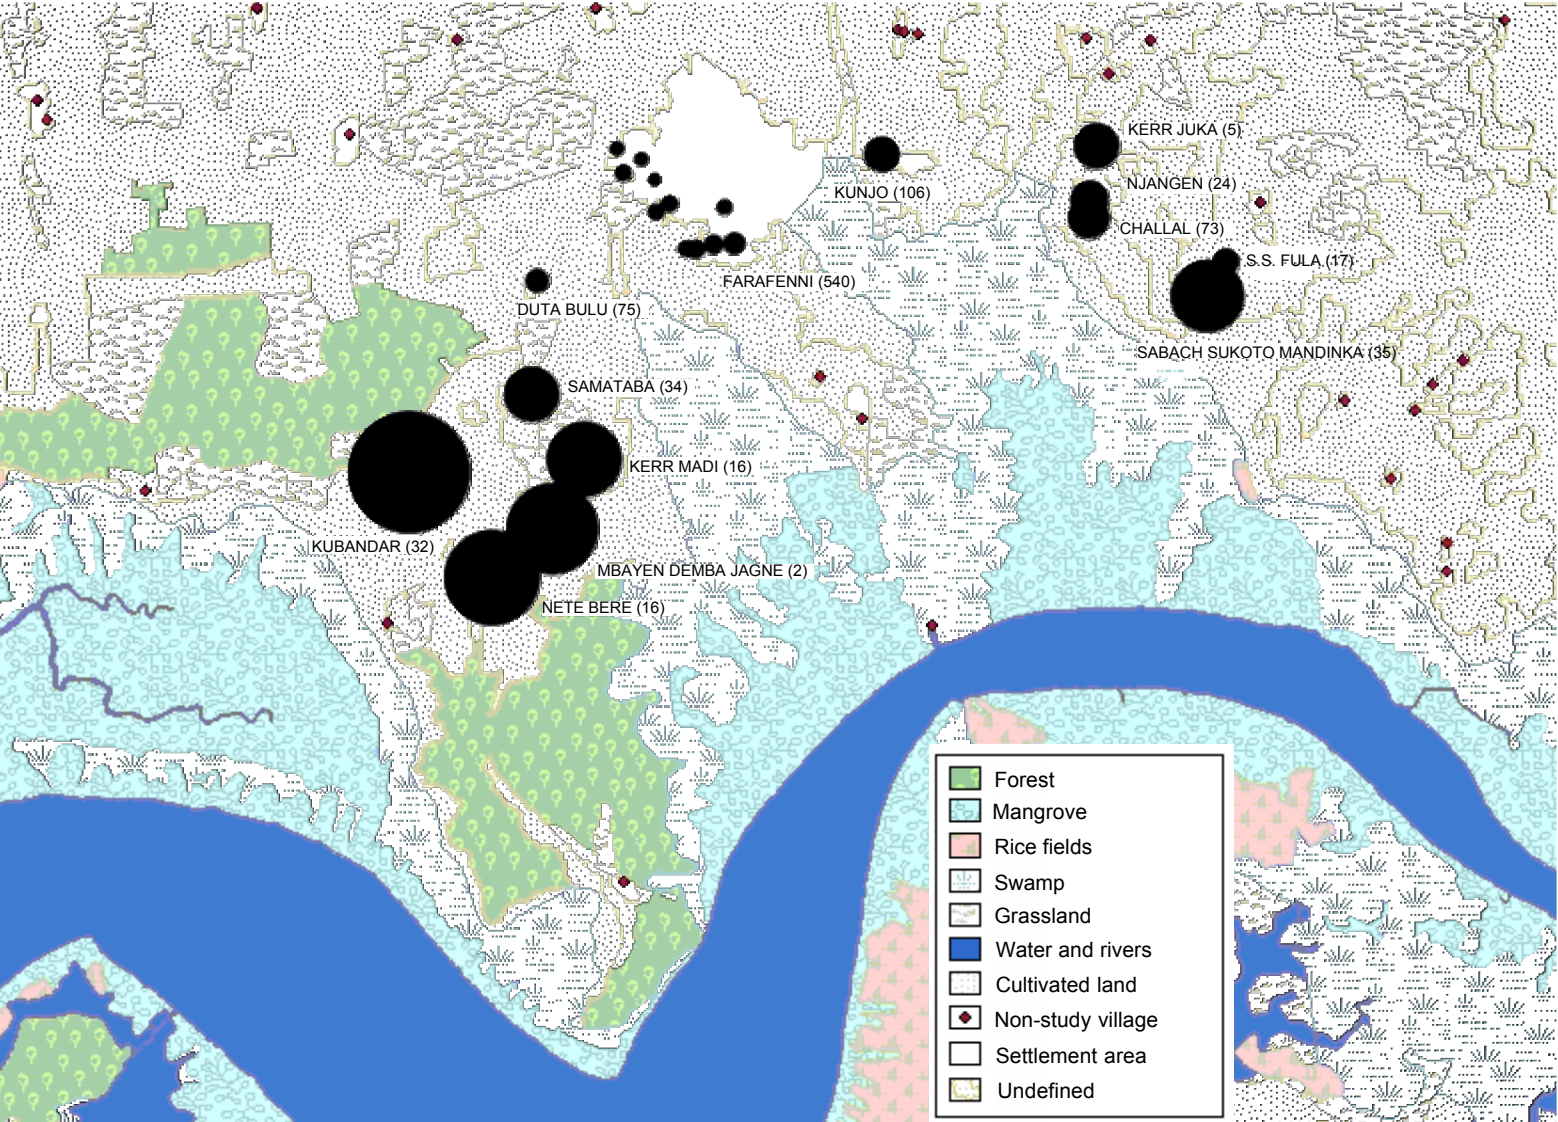

- Forest
- Mangrove
- Rice fields
- Swamp
- Grassland
- Water and rivers
- Cultivated land
- Non-study village
- Settlement area
- Undefined

KUNJO (106)

FARAFENNI (540)

KERR JUKA (5)

NJANGEN (24)

CHALLAL (73)

S.S. FULA (17)

DUTA BULU (75)

SAMATABA (34)

KERR MADI (16)

SABACH SUKOTO MANDINKA (35)

KUBANDAR (32)

MBAYEN DEMBA JAGNE (2)

NETE BERE (16)
